# Supplementary material
Source: PubMed Central journal article supplement (PMC6461047)
Supplement: NIHMS1505886-supplement-1.pdf [file NIHMS1505886-supplement-1.pdf]

1 Supplemental Table S1. P-values associated with PRS with different p-value thresholds  
 2 predicting antipsychotic efficacy in each cohort.

3

| <b>PRS pT</b>     | <b>5x10<sup>-8</sup></b> | <b>0.001</b> | <b>0.01</b> | <b>0.05</b> | <b>0.10</b> | <b>0.20</b> | <b>0.50</b> |
|-------------------|--------------------------|--------------|-------------|-------------|-------------|-------------|-------------|
| <b>ZHH Old FE</b> | .54                      | .28          | .013        | .031        | .024        | .028        | .028        |
| <b>EUFEST</b>     | .61                      | .26          | .012        | .050        | .041        | .012        | .014        |
| <b>PAFIP</b>      | .58                      | .13          | .006        | .017        | .025        | .068        | .150        |
| <b>CIDAR</b>      | .94                      | .21          | .96         | .73         | .22         | .24         | .18         |

4

5

1 Supplemental Table S2. Secondary analysis of response rate in each cohort, separated by  
 2 Caucasians and non-Caucasians. Low versus high PRS classifications were median split within  
 3 each cohort or sub-cohort.

4

|                   | <b>Reported Full Sample</b> |           | <b>Caucasians</b> |          | <b>Non-Caucasians</b> |          |
|-------------------|-----------------------------|-----------|-------------------|----------|-----------------------|----------|
|                   | Low PRS                     | High PRS  | Low PRS           | High PRS | Low PRS               | High PRS |
| <b>ZHH Old FE</b> | 57.9%                       | 51.3%     | 60.0%             | 44.4%    | 62.1%                 | 48.3%    |
|                   | (22/38)                     | (20/39)   | (6/10)            | (4/9)    | (18/29)               | (14/29)  |
| <b>EUFEST</b>     | 65.7%                       | 42.3%     | 65.7%             | 42.3%    | 80.0%                 | 50.0%    |
|                   | (46/70)                     | (30/71)   | (46/70)           | (30/71)  | (4/5)                 | (2/4)    |
| <b>PAFIP</b>      | 58.9%                       | 48.5%     | 58.9%             | 48.5%    | NA                    | NA       |
|                   | (56/95)                     | (47/97)   | (56/95)           | (47/97)  |                       |          |
| <b>CIDAR</b>      | 60.0%                       | 74.0%     | 61.1%             | 70.6%    | 64.5%                 | 72.7%    |
|                   | (30/50)                     | (37/50)   | (11/18)           | (12/17)  | (20/31)               | (24/33)  |
| <b>Total</b>      | 60.9%                       | 52.1%     | 61.7%             | 47.9%    | 64.6%                 | 60.6%    |
|                   | (154/253)                   | (134/257) | (119/193)         | (93/194) | (42/65)               | (40/66)  |

5

6
